# Supplementary material for: Methylation at Global LINE-1 Repeats in Human Blood Are Affected by Gender but Not by Age or Natural Hormone Cycles
Source: PubMed Central journal article supplement (PMC3023801; doi:10.1371/journal.pone.0016252), 2011-01-19
Supplement: pone.0016252.s004.pdf [file pone.0016252.s004.pdf]

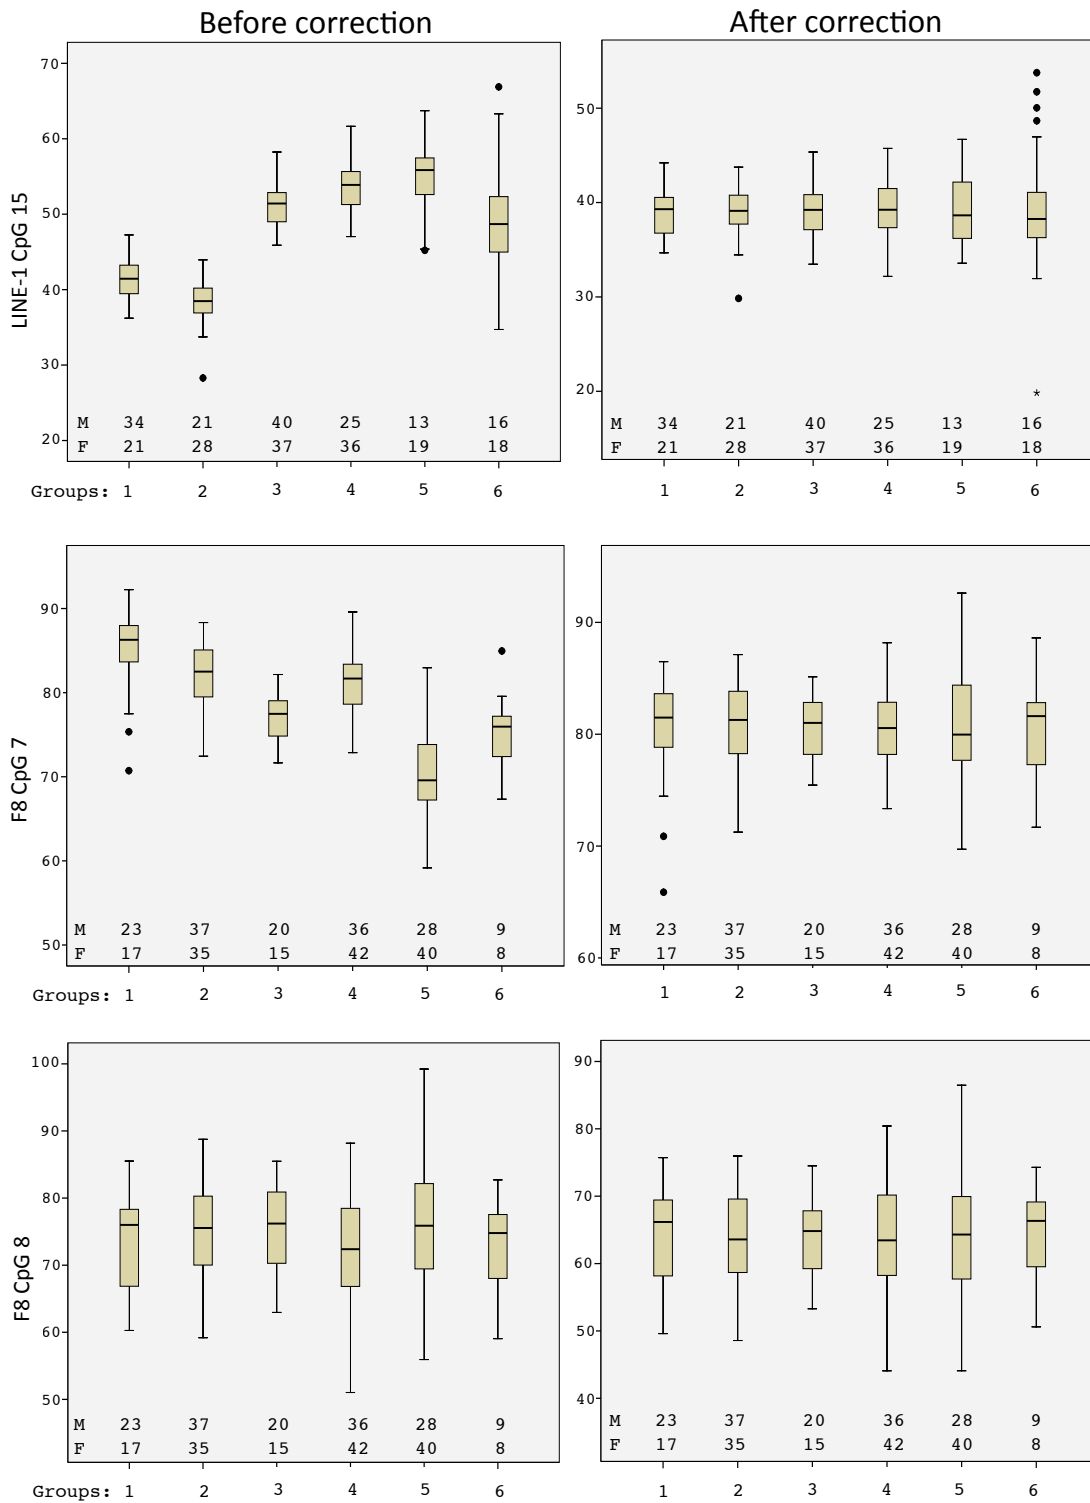

Supplementary Figure S4: A) Methylation values distribution in the six experimental groups before and after the correction. In every group, the number of males and females is also shown.

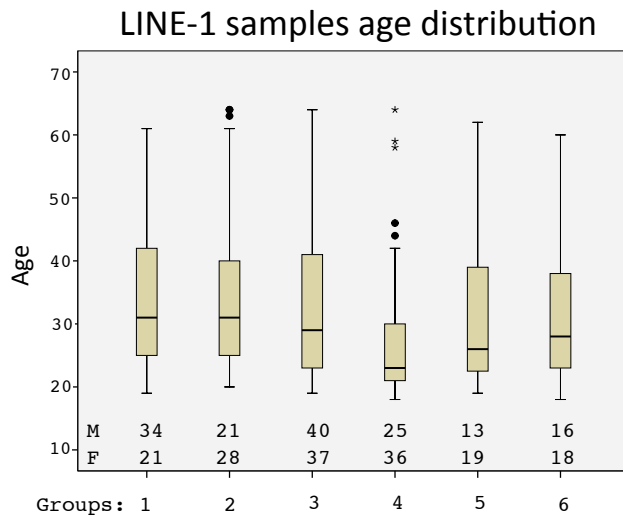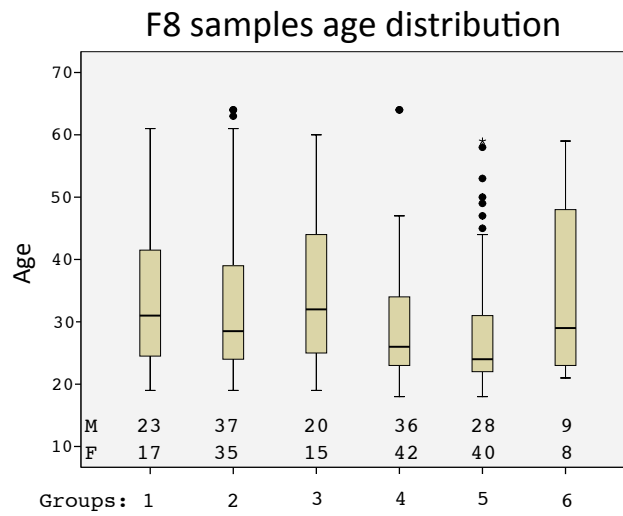

Supplementary figure S4: B) Age distribution in the six experimental groups. In every group, the number of males and females is also shown.
