# Supplementary material for: Methylation at Global LINE-1 Repeats in Human Blood Are Affected by Gender but Not by Age or Natural Hormone Cycles
Source: PubMed Central journal article supplement (PMC3023801; doi:10.1371/journal.pone.0016252), 2011-01-19
Supplement: pone.0016252.s005.pdf [file pone.0016252.s005.pdf]

**Supplementary Table S1: primer sequences used in this study**

| bisulfite primer                                          |                                       | Annealing | Product | Pyrosequencing/SIRPH |                                              |
|-----------------------------------------------------------|---------------------------------------|-----------|---------|----------------------|----------------------------------------------|
| Name                                                      | Sequence 5' to 3'                     |           |         | Name                 | Sequence                                     |
| <b>Bisulfite</b>                                          |                                       |           |         |                      |                                              |
| <i>L1 repeats, Genome wide, X58075 (Suppl Fig S1)</i>     |                                       |           |         |                      |                                              |
| Bi-L1-F1                                                  | att tta tta ggg agt gtt aga tag tg    | 59°C      | 410 bp  | SN-L1-8 (Pyro)       | ttt ggg ttt ttt tta tt                       |
| Bi-L1-R2                                                  | tta aac tat aat aaa ctc cac cca at    |           |         | SN-L1-9              | ggg agt gtt aga tag tgg g                    |
| <i>Alu repeats, Genome wide, Consensus (Suppl Fig S1)</i> |                                       |           |         |                      |                                              |
| Bi-Alu-All-F3                                             | ttg taa ttt tag tat ttt ggg           | 49°C      | 237 bp  | SN-Alu-1             | (ttt t)ag gtt gag gta gga gaa t              |
| Bi-Alu-All-R2                                             | cca aac taa aat aca ata a             |           |         | SN-Alu-4             | (ttt ttt) ttt tta tta aaa ata taa aaa tta gt |
| <i>F8-ex14, Xq28, M88640</i>                              |                                       |           |         |                      |                                              |
| Bi-F8Ex14-F5                                              | tag taa tgg gtt ttt tgg tta ttt gga t | 50°C      | 617 bp  | SN-F8-1              | gat gaa aat tag agt ttt                      |
| Bi-F8Ex14-R6                                              | taa aaa act act cat ccc ata atc cca a |           |         |                      |                                              |
| Bi-F8Ex14-F6                                              | agg gag ttt ttt tta ggg aat aga ggg a | 55°C      | 561 bp  |                      |                                              |
| Bi-F8Ex14-R5                                              | taa tcc caa aac ctc tcc act aca aca a |           |         |                      |                                              |
| <b>RT-PCRs</b>                                            |                                       |           |         |                      |                                              |
| <i>Androgen receptor, Xq11.2-q12, NM_000044.2</i>         |                                       |           |         |                      |                                              |
| R-AR-F1                                                   | atg tcc tgg aag cca ttg ag            | 61°C      | 323 bp  |                      |                                              |
| R-AR-R1                                                   | gct gta cat ccg gga ctt gt            |           |         |                      |                                              |
| <i>Estrogen receptor 1, 6q25.1, NM_000125.3</i>           |                                       |           |         |                      |                                              |
| R-ERalpha-F1                                              | aca agc gcc aga gag atg at            | 61°C      | 361 bp  |                      |                                              |
| R-ERalpha-R1                                              | agg atc tct agc cag gca ca            |           |         |                      |                                              |
| <i>Estrogen receptor 2, 14q23.2, NM_001040275.1</i>       |                                       |           |         |                      |                                              |
| R-ERbeta-F                                                | caa tcc atc tta ccc ctg ga            | 59°C      | 379 bp  |                      |                                              |
| R-ERbeta-R                                                | cat ccc tct ttg aac ctg ga            |           |         |                      |                                              |
| <i>Progesteron receptor, 11q22-23, NM_000926.4</i>        |                                       |           |         |                      |                                              |
| R-PR-F1                                                   | tgg aag aaa tga ctg cat cg            | 59°C      | 363 bp  |                      |                                              |
| R-PR-R1                                                   | tgc ctc tgc cct agt tga tt            |           |         |                      |                                              |
| <i>GAPDH control</i>                                      |                                       |           |         |                      |                                              |
| RT-GAPDH-F                                                | tca cca ggg ctg ctt tta ac            | 59°C      | 508 bp  |                      |                                              |
| RT-GAPDH-R                                                | gtc ttc tgg gtg gca gtg at            |           |         |                      |                                              |
