# Supplementary material for: Methylation at Global LINE-1 Repeats in Human Blood Are Affected by Gender but Not by Age or Natural Hormone Cycles
Source: PubMed Central journal article supplement (PMC3023801; doi:10.1371/journal.pone.0016252), 2011-01-19
Supplement: pone.0016252.s006.pdf [file pone.0016252.s006.pdf]

## Supplementary Table S2:

Summary findings of several studies that analyzed LINE-1 global methylation in healthy human individuals.

|          | Study                       | Samples Characteristics |                         |            |                                | Method used    | Results                        |             | Ref. |
|----------|-----------------------------|-------------------------|-------------------------|------------|--------------------------------|----------------|--------------------------------|-------------|------|
|          |                             | Sample size             | age                     | gender     | tissue                         |                | age                            | gender      |      |
| <b>1</b> | Bollati V et al, 2009       | 1097 (718 subjects)     | 55-92                   | only males | peripheral blood               | Pyrosequencing | no effect-borderline decrease  | Not studied | 33   |
| <b>2</b> | Wihelm CS et al, 2010       | 465 subjects            | 61.7±10.4               | 297M 168F  | peripheral blood               | Pyrosequencing | no effect                      | Male higher | 37   |
| <b>3</b> | Jintaridth P et al, 2010    | 177 subjects            | 20-88 (Mean=52.92±1.19) | 42M 135F   | mononuclear peripheral blood   | COBRA          | no effect                      | no effect   | 35   |
| <b>4</b> | Chalitchagorn K et al, 2004 | 32 subjects             | not reported            | 16M 16F    | peripheral blood               | COBRA          | no effect                      | no effect   | 11   |
| <b>5</b> | Figueredo JC et al, 2009    | 388 subjects            | 57.8±9.1                | 246M 142F  | Colon tissues (left and right) | Pyrosequencing | no effect                      | no effect   | 38   |
| <b>6</b> | Iacopetta B et al, 2007     | 178                     | 68.8±13.9               | 124M 81F   | Colonic mucosa                 | Methylight     | no effect-tendency to decrease | no effect   | 34   |
